# Supplementary material
Source: MDPI journal article supplement (https://www.mdpi.com/2073-4395/12/7/1528)
Supplement: s1 [file s1]

**Table S1.** Rainfall, temperature and leaf wetness periods on rainy days at the Ari vineyard in 2015.

| Date       | Maximum<br>Temperature (°C) | Minimum<br>Temperature (°C) | Rainfall<br>(mm <sup>-1</sup> /day) | Plant wetting<br>(hours/day) |
|------------|-----------------------------|-----------------------------|-------------------------------------|------------------------------|
| 01/05/2015 | 23.1                        | 12.3                        | 1.1                                 | 1                            |
| 16/05/2015 | 20.9                        | 16.1                        | 5.8                                 | 2                            |
| 19/05/2015 | 27.1                        | 15.3                        | 3.1                                 | 2                            |
| 20/05/2015 | 24.9                        | 18.8                        | 3.2                                 | 3                            |
| 21/05/2015 | 22.9                        | 18.6                        | 15.1                                | 18                           |
| 22/05/2015 | 19.0                        | 14.0                        | 50.9                                | 20                           |
| 23/05/2015 | 17.9                        | 12.1                        | 13.0                                | 16                           |
| 24/05/2015 | 19.0                        | 12.4                        | 10.0                                | 15                           |
| 25/05/2015 | 21.1                        | 12.2                        | 4.9                                 | 7                            |
| 26/05/2015 | 19.9                        | 15.2                        | 17.8                                | 12                           |
| 27/05/2015 | 18.9                        | 14.2                        | 7.9                                 | 8                            |
| 28/05/2015 | 20.0                        | 14.2                        | 6.2                                 | 8                            |
| 12/06/2015 | 27.9                        | 20.0                        | 2.8                                 | 3                            |
| 13/06/2015 | 28.0                        | 20.3                        | 3.1                                 | 3                            |
| 14/06/2015 | 29.4                        | 20.7                        | 2.1                                 | 2                            |
| 15/06/2015 | 27.3                        | 18.9                        | 3.1                                 | 4                            |
| 17/06/2015 | 21.2                        | 16.9                        | 22.1                                | 13                           |
| 18/06/2015 | 23.3                        | 14.9                        | 10.3                                | 12                           |
| 19/06/2015 | 25.4                        | 14.4                        | 2.2                                 | 1                            |
| 20/06/2015 | 20.3                        | 13.2                        | 4.2                                 | 3                            |
| 24/06/2015 | 22.1                        | 14.1                        | 30.5                                | 16                           |
| 07/08/2015 | 25.1                        | 20.6                        | 75.1                                | 10                           |
| 15/08/2015 | 24.4                        | 19.4                        | 1.1                                 | 2                            |
| 16/08/2015 | 23.6                        | 17.6                        | 40.3                                | 16                           |
| 04/09/2015 | 21.1                        | 16.3                        | 13.2                                | 20                           |
| 08/09/2015 | 26.2                        | 19.2                        | 0.5                                 | 2                            |
| 20/09/2015 | 23.4                        | 18.1                        | 25.2                                | 16                           |
| 21/09/2015 | 22.9                        | 18.1                        | 2.1                                 | 2                            |
| 23/09/2015 | 28.2                        | 15.2                        | 6.3                                 | 11                           |
| 24/09/2015 | 19.4                        | 14.9                        | 34.1                                | 16                           |
| 25/09/2015 | 18.9                        | 14.0                        | 24.1                                | 18                           |
| 26/09/2015 | 20.9                        | 15.9                        | 15.2                                | 12                           |
| 01/10/2015 | 18.1                        | 13.6                        | 7.2                                 | 8                            |
| 02/10/2015 | 22.0                        | 15.5                        | 3.0                                 | 3                            |

**Table S2.** Rainfall, temperature and leaf wetness periods on rainy days at the Ari vineyard in 2016.

| Date       | Maximum<br>Temperature (°C) | Minimum<br>Temperature (°C) | Rainfall<br>(mm <sup>-1</sup> /day) | Plant wetting<br>(hours/day) |
|------------|-----------------------------|-----------------------------|-------------------------------------|------------------------------|
| 01/05/2016 | 17.1                        | 11.4                        | 11.0                                | 12                           |
| 02/05/2016 | 14.9                        | 10.8                        | 28.0                                | 18                           |
| 03/05/2016 | 17.9                        | 10.8                        | 4.2                                 | 14                           |
| 04/05/2016 | 17.0                        | 11.9                        | 2.1                                 | 13                           |
| 11/05/2016 | 20.9                        | 15.7                        | 3.3                                 | 4                            |
| 12/05/2016 | 20.9                        | 15.1                        | 7.1                                 | 10                           |
| 15/05/2016 | 20.0                        | 14.0                        | 20.2                                | 11                           |
| 16/05/2016 | 16.9                        | 13.1                        | 3.2                                 | 6                            |
| 17/05/2016 | 15.9                        | 12.0                        | 5.5                                 | 7                            |
| 19/05/2016 | 18.9                        | 14.5                        | 8.4                                 | 8                            |
| 20/05/2016 | 16.2                        | 10.0                        | 21.2                                | 13                           |
| 01/06/2016 | 22.1                        | 16.9                        | 4.1                                 | 3                            |
| 02/06/2016 | 23.4                        | 13.2                        | 10.4                                | 6                            |
| 03/06/2016 | 23.5                        | 14.1                        | 8.2                                 | 8                            |
| 04/06/2016 | 23.2                        | 16.8                        | 2.2                                 | 3                            |
| 05/06/2016 | 23.1                        | 17.9                        | 5.3                                 | 7                            |
| 09/06/2016 | 21.9                        | 18.8                        | 12.4                                | 8                            |
| 10/06/2016 | 24.3                        | 17.4                        | 5.2                                 | 6                            |
| 12/06/2016 | 22.9                        | 18.8                        | 16.6                                | 14                           |
| 13/06/2016 | 23.0                        | 16.9                        | 6.2                                 | 9                            |
| 14/06/2016 | 24.0                        | 17.7                        | 8.4                                 | 11                           |
| 19/06/2016 | 17.4                        | 12.5                        | 15.2                                | 10                           |
| 20/06/2016 | 18.3                        | 12.3                        | 0.6                                 | 2                            |
| 23/06/2016 | 24.7                        | 18.8                        | 1.4                                 | 2                            |
| 06/07/2016 | 23.7                        | 20.0                        | 0.8                                 | 3                            |
| 09/07/2016 | 27.8                        | 22.1                        | 1.6                                 | 1                            |
| 15/07/2016 | 14.6                        | 12.8                        | 100.8                               | 19                           |
| 16/07/2016 | 14.1                        | 12.8                        | 47.6                                | 21                           |
| 01/08/2016 | 24.7                        | 18.8                        | 14.2                                | 7                            |
| 23/08/2016 | 20.5                        | 16.4                        | 0.4                                 | 4                            |
| 31/08/2016 | 21.6                        | 18.8                        | 1.2                                 | 8                            |
| 05/09/2016 | 23.7                        | 16.3                        | 2.6                                 | 6                            |
| 06/09/2016 | 17.2                        | 12.6                        | 22.6                                | 12                           |
| 07/09/2016 | 16.2                        | 14.0                        | 10.6                                | 22                           |
| 08/09/2016 | 19.2                        | 14.4                        | 0.2                                 | 9                            |
| 09/09/2016 | 21.2                        | 17.7                        | 1.0                                 | 3                            |
| 10/09/2016 | 21.2                        | 17.6                        | 0.4                                 | 3                            |
| 11/09/2016 | 19.5                        | 16.9                        | 6.0                                 | 10                           |
| 12/09/2016 | 20.7                        | 17.1                        | 0.8                                 | 7                            |

|            |      |      |      |    |
|------------|------|------|------|----|
| 16/09/2016 | 21.3 | 17.8 | 7.2  | 4  |
| 18/09/2016 | 18.8 | 15.4 | 0.6  | 3  |
| 19/09/2016 | 16.3 | 13.2 | 8.4  | 6  |
| 21/09/2016 | 17.2 | 14.9 | 2.0  | 5  |
| 02/10/2016 | 20.9 | 17.9 | 19.1 | 13 |

---
